# Supplementary material
Source: PubMed Central journal article supplement (PMC4570285)
Supplement: mmc1.pdf [file mmc1.pdf]

The American Journal of Human Genetics

Supplemental Data

## **Autosomal-Dominant Multiple Pterygium Syndrome Is Caused by Mutations in *MYH3***

Jessica X. Chong, Lindsay C. Burrage, Anita E. Beck, Colby T. Marvin, Margaret J. McMillin, Kathryn M. Shively, Tanya M. Harrell, Kati J. Buckingham, Carlos A. Bacino, Mahim Jain, Yasemin Alanay, Susan A. Berry, John C. Carey, Richard A. Gibbs, Brendan H. Lee, Deborah Krakow, Jay Shendure, Deborah A. Nickerson, University of Washington Center for Mendelian Genomics, and Michael J. Bamshad

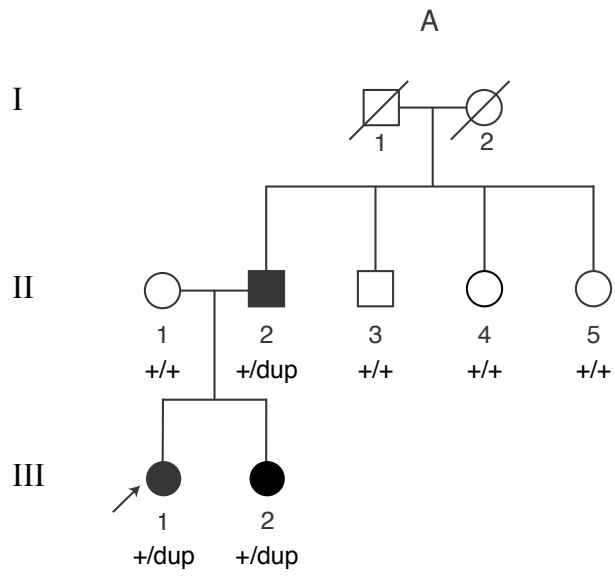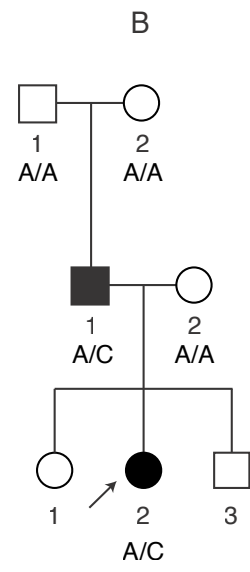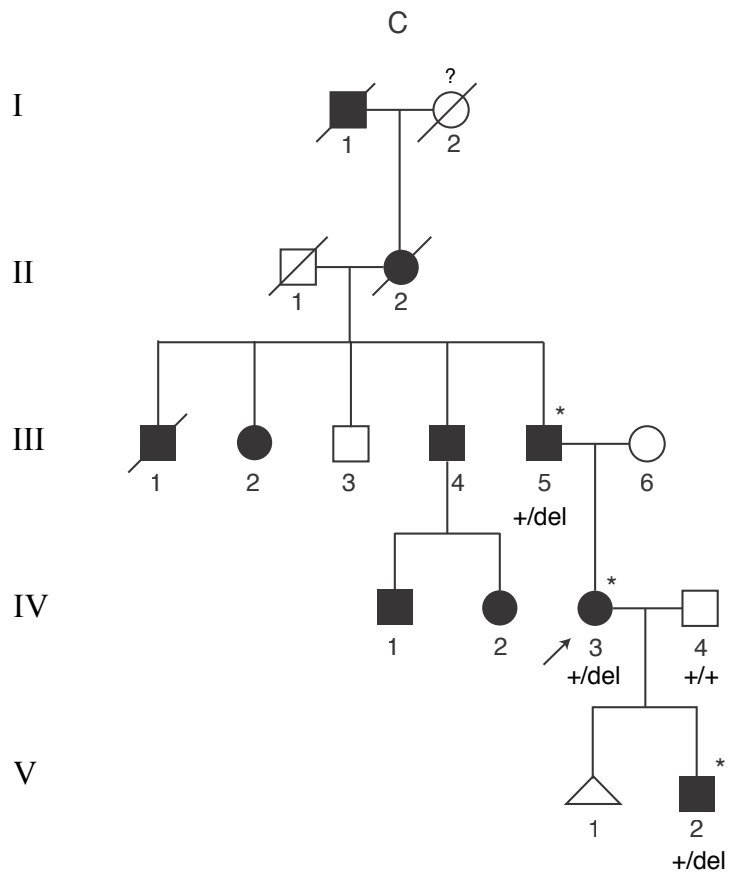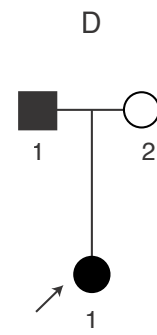

**Figure S1. Pedigrees of families of persons initially diagnosed with Distal Arthrogryposis type 8.**

Case identifiers for each individual shown correspond to those in Table 1 and Figures 1 and 2. Each pedigree depicts a multiplex family (i.e., multiple persons affected with DA8) and mutation statuses confirmed by Sanger sequencing are provided below each individual. In family A, dup = c.3214\_3216dup [p.(Asn1072dup)]. In family B, C = c.3224A>C [p.(Gln1075Pro)]. In family C, del = c.727\_729del [p.(Ser243del)]. No mutation in *MYH3* was identified in family D.
